# Supplementary material
Source: publisher figshare collection journal article supplement (https://sage.figshare.com/ndownloader/files/18737126)
Supplement: Supplementary file 1 [file 18737126]

Reviewer 2 v.2

Comments to the Author

Page 4, 16. Change "lots of complications" to "many complications"

Otherwise the paper is well written and provides an important addition to the scientific literature.
